# Supplementary material for: Mechanisms and therapeutic effectiveness of lactobacilli
Source: PubMed Central journal article supplement — J Clin Pathol. 2015 Nov 17;69(3):187–203. doi: 10.1136/jclinpath-2015-202976 (PMC4789713; doi:10.1136/jclinpath-2015-202976), 2015-11-17
Supplement: jclinpath-2015-202976-s1.pdf [file jclinpath-2015-202976-s1.pdf]

Il microbioma intestinale non è un ecosistema silenzioso ma esercita diverse funzioni fisiologiche e immunologiche. Per molti decenni, i lattobacilli sono stati utilizzati come terapia efficace per il trattamento di varie condizioni patologiche mostrando un profilo di sicurezza generale positivo. Questa review riassume i meccanismi e le prove cliniche a sostegno dell'efficacia terapeutica dei lattobacilli.

Abbiamo effettuato una ricerca su Pubmed/Medline utilizzando la parola chiave “*Lactobacillus*”. I lavori selezionati dal 1950 al 2015 sono stati scelti sulla base del loro contenuto.

Sono stati inclusi articoli sperimentali e di rilevanza clinica che hanno utilizzato i lattobacilli come agenti terapeutici. Le applicazioni dei lattobacilli includono il supporto renale, la salute del pancreas, la gestione dello squilibrio metabolico e il trattamento e la prevenzione del cancro. Ricerche *in vitro* e *in vivo* hanno dimostrato che la prolungata somministrazione di lattobacilli induce modifiche qualitative e quantitative nell'ecosistema microbico gastrointestinale umano con incoraggianti prospettive nel contrastare alterazioni immunologiche e fisiologiche associate a patologie. Sebbene pochi studi hanno evidenziato il rischio di traslocazione con conseguente sepsi e batteriemia dopo la somministrazione di probiotici, c'è ancora una penuria di indagini su dose/effetto di questi ultimi. Pertanto è richiesta grande attenzione nella scelta della corretta specie di lattobacillo, la sua stabilità genetica e il rischio di traslocazione che possono essere correlate ad un'aumentata permeabilità intestinale che si manifesta tipicamente in caso di patologia infiammatoria. Infine, abbiamo bisogno di determinare l'adeguata quantità di batteri da assumere durante ciascuna assunzione al fine di ottenere la miglior efficacia clinica diminuendo il rischio di effetti collaterali.
